# Supplementary material for: Biallelic mutations in the SARS2 gene presenting as congenital sideroblastic anemia
Source: PubMed Central journal article supplement — Haematologica. 2021 Aug 19;106(12):3202–5. doi: 10.3324/haematol.2021.279138 (PMC8634176; doi:10.3324/haematol.2021.279138), 2021-08-19
Supplement: 2021_279138_COLIN_SUPPL.pdf [file 2021_279138_COLIN_SUPPL.pdf]

**Biallelic mutations in the SARS2 gene presenting as congenital sideroblastic anemia**

Elia Colin,<sup>1</sup> Geneviève Courtois,<sup>1</sup> Chantal Brouzes,<sup>2</sup> Juliette Pulman,<sup>3</sup> Marion Rabant,<sup>4</sup> Agnès Rötig,<sup>3</sup> Hélène Taffin,<sup>5</sup> Mathilde Lion-Lambert,<sup>5</sup> Sylvie Fabrega,<sup>6</sup> Lydie Da Costa,<sup>7</sup> Mariane De Montalembert,<sup>8</sup> Rémi Salomon,<sup>5</sup> Olivier Hermine<sup>9</sup> and Lucile Couronné<sup>10</sup>

<sup>1</sup>Laboratory of Cellular and Molecular Mechanisms of Hematological Disorders and Therapeutic Implications, INSERM U1163, Imagine Institute, University of Paris, Laboratory of Excellence GR-Ex; <sup>2</sup>Hematology Laboratory, Hôpital Necker-Enfants Malades, Assistance publique-Hôpitaux de Paris (AP-HP); <sup>3</sup>Laboratory for Genetics of Mitochondrial Disorders, INSERM U1163, Imagine Institute, University of Paris; <sup>4</sup>Department of Pathology, Hôpital Necker - Enfants Malades, Assistance Publique-Hôpitaux de Paris, University of Paris; <sup>5</sup>Department of Pediatric Nephrology, MARHEA, Hôpital Necker - Enfants Malades, Assistance Publique-Hôpitaux de Paris (AP-HP); <sup>6</sup>VVTG platform, SFR Necker; <sup>7</sup>Hematology Laboratory, Robert Debré Hospital, Assistance Publique-Hôpitaux de Paris (AP-HP), University of Paris, Laboratory of Excellence GR-Ex; <sup>8</sup>Department of General Pediatrics and Pediatric Infectious Diseases, Reference Center for Sickle Cell Disease, Hôpital Necker - Enfants Malades, Assistance Publique-Hôpitaux de Paris (AP-HP), Université de Paris; <sup>9</sup>Hematology Department, Hôpital Necker - Enfants Malades, Assistance Publique - Hôpitaux de Paris (APHP), Laboratory of Cellular and Molecular Mechanisms of Hematological Disorders and Therapeutic Implications, INSERM U1163, Imagine Institute, University of Paris, Laboratory of Excellence GR-Ex and <sup>10</sup>Laboratory of Onco-Hematology, Hôpital Necker - Enfants Malades, Assistance Publique - Hôpitaux de Paris (APHP), Laboratory of Cellular and Molecular Mechanisms of Hematological Disorders and Therapeutic Implications, INSERM U1163, Imagine Institute, University of Paris, Laboratory of Excellence GR-Ex, Paris, France

Correspondence: ELIA COLIN - elia.colin@hotmail.fr

doi:10.3324/haematol.2021.279138

## Biallelic mutations in the *SARS2* gene presenting as congenital sideroblastic anemia

### Supplemental tables

Table S1

|                         | <b>Variables</b>                                  | <b>Proband</b> | <b>Normal reference range</b> |
|-------------------------|---------------------------------------------------|----------------|-------------------------------|
| Blood biochemistry test | Urea (mmol/L)                                     | 34.4           | 1.6-6.5                       |
|                         | Creatinin ( $\mu\text{mol/L}$ )                   | 171            | 26-42                         |
|                         | Uric acid ( $\mu\text{mol/L}$ )                   | 790            | 120-320                       |
|                         | Sodium (mmol/L)                                   | 140            | 136-146                       |
|                         | Potassium (mmol/L)                                | 5              | 3.1-4.7                       |
|                         | Calcium (mmol/L)                                  | 2.53           | 2.20-2.70                     |
|                         | Phosphate (mmol/L)                                | 1.31           | 1.3-1.85                      |
|                         | Haptoglobin (g/L)                                 | <0.08          | 0.47-1.25                     |
|                         | Total bilirubin ( $\mu\text{mol/L}$ )             | 10             | 0-17                          |
|                         | Lactate dehydrogenase (IU/L)                      | 267            | 125-243                       |
| Blood Count             | Hemoglobin (g/dL)                                 | 9              | 11.5-13.5                     |
|                         | Hematocrit (%)                                    | 25.7           | 34-40                         |
|                         | Mean Corpuscular Volume (fL)                      | 80             | 75-81                         |
|                         | White Blood Cells (G/L)                           | 9.4            | 6.0-17.0                      |
|                         | Neutrophils (G/L)                                 | 5.8            | 1.5-8.5                       |
|                         | Platelets (G/L)                                   | 170            | 175-500                       |
|                         | Reticulocytes (G/L)                               | 63             |                               |
|                         | Schizocytes                                       | <1%            |                               |
| Iron status             | Iron ( $\mu\text{mol/L}$ )                        | 20             | 7.0-30                        |
|                         | Transferrin (g/L)                                 | 1.88           | 1.9-3.02                      |
|                         | Total Iron Binding Capacity ( $\mu\text{mol/L}$ ) | 47             | 45-80                         |
|                         | Transferrin saturation (%)                        | 43             | 16-35                         |
|                         | Ferritin ( $\mu\text{g/L}$ )                      | 1621           | 15-80                         |

**Supplemental Table 1:** Laboratory data of the proband at diagnosis

Table S2

| Authors, year                   | Gender | Family | Diagnosis                   | Age at diagnosis | Anemia | Hemoglobin at diagnosis (g/dL) | Other cytopenia              | Age at death | SARS2 mutation                                                |
|---------------------------------|--------|--------|-----------------------------|------------------|--------|--------------------------------|------------------------------|--------------|---------------------------------------------------------------|
| This article                    | M      | 1      | HUPRA syndrome              | 3 years old      | Yes    | 9                              | No                           | 5 years old  | compound heterozygous c.1031G>A (p.R344Q) c.1205G>A (p.R402H) |
| Belostotsky <i>et al</i> , 2011 | M      | 2      | HUPRA syndrome              | 4 months         | Yes    | 9                              | Thrombocytopenia, leukopenia | 14 months    | homozygous c.1169A>G (p.D390G)                                |
| Belostotsky <i>et al</i> , 2011 | F      | 2      | HUPRA syndrome              | 7 months         | Yes    | 4,8                            | Leukopenia                   | 10 months    | homozygous c.1169A>G (p.D390G)                                |
| Belostotsky <i>et al</i> , 2011 | F      | 3      | HUPRA syndrome              | 4 months         | No     | N/A                            | No                           | 13 months    | homozygous c.1169A>G (p.D390G)                                |
| Rivera <i>et al</i> , 2013      | F      | 4      | HUPRA syndrome              | 15 months        | Yes    | 8,4                            | No                           | 26 months    | homozygous c.1205G>A (p.R402H)                                |
| Rivera <i>et al</i> , 2013      | M      | 4      | HUPRA syndrome              | 2 months         | Yes    | 7,6                            | No                           | 21 months    | homozygous c.1205G>A (p.R402H)                                |
| Linnankivi <i>et al</i> , 2016  | M      | 5      | Progressive spastic paresis | 10 years old     | No     | N/A                            | No                           | Alive        | homozygous c.1347>A (splicing mutation)                       |
| Zhou <i>et al</i> , 2021        | F      | 6      | HUPRA syndrome              | 4 years old      | Yes    | 8,7                            | No                           | 5 years old  | compound heterozygous c.667G>A (p.V223M) c.1205G>A (p.R402H)  |

**Supplemental Table 2:** Hematological and molecular findings in patients carrying pathogenic SARS2 variants.<sup>7-9</sup> N/A: not available

## Supplemental figures

Figure S1

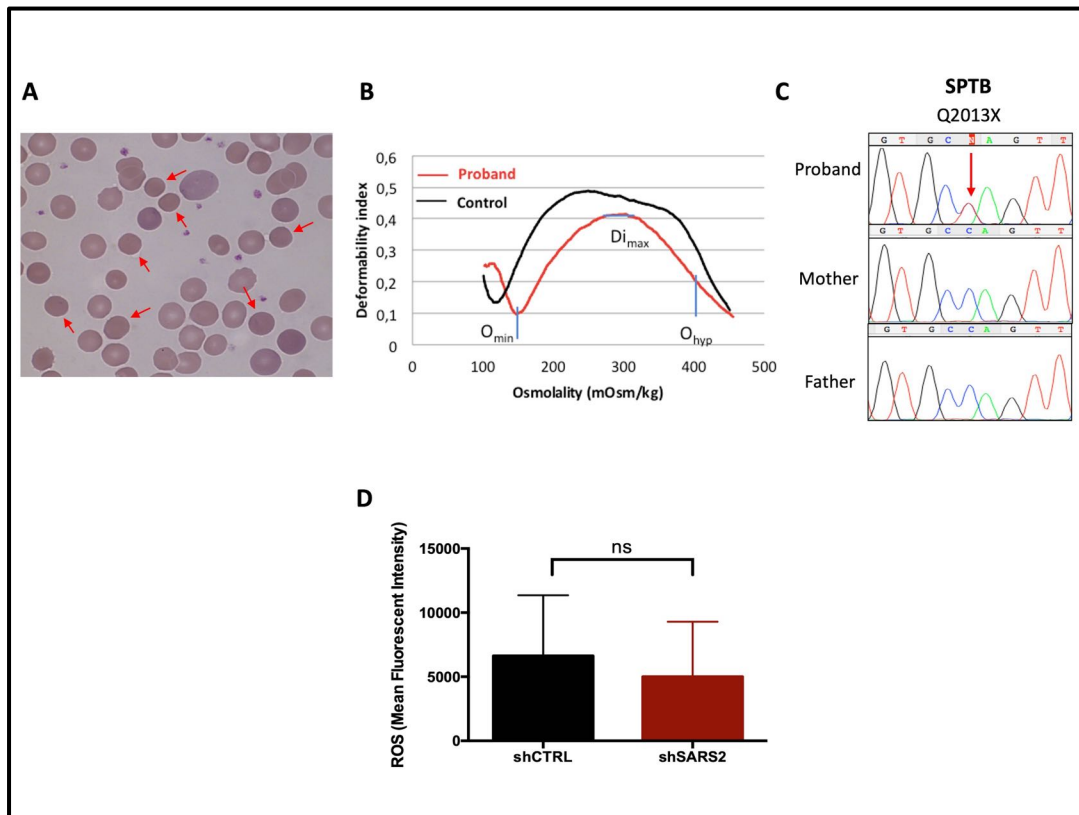

### Supplemental Figure 1

(A) Peripheral blood smear of the patient showing the presence of spherocytes. (B) Ektacytometry curves of the proband and a control.  $O_{min}$  represents the osmolality at which 50% of the cells hemolyze.  $Di_{max}$  is the maximum elongation that the red blood cells can achieve under shear stress.  $O_{hyp}$  is the osmolality at which the  $Di_{max}$  is 50% of its maximum value. In the proband, the right shift of the  $O_{min}$  indicates a reduced surface to volume ratio; the  $Di_{max}$  decrease reflects decreased red cell deformability due to a loss of surface area; and the left shift of the  $O_{hyp}$  corresponds to the dehydration of the cells (C) Sanger-sequencing validation of *SPTB* c.6037C>T (p.Q2013X) mutation detected by NGS. Red arrow indicates the position of the nucleotide's substitution. (D) At day 6 of the second phase of culture, reactive oxygen species (ROS) production was measured by flow cytometry in shCTRL and shSARS2-transduced cells using the CellROX deep red reagent. Results are represented as Mean Fluorescence Intensity of the stained cells. Error bars represent standard deviation (SD) from mean of three independent experiments. *P*-values are determined by two-tailed *t*-test. ns: not significant.
